# Supplementary material for: Polyaniline–polystyrene membrane for simple and efficient retrieval of double-stranded DNA from aqueous media
Source: Royal Society of Chemistry journal article supplement (doi:10.1039/c6ra17353e), 2016-01-01
Supplement: c6ra17353e1.pdf [file c6ra17353e1.pdf]

## Supporting Information

### Polyaniline-polystyrene membrane for simple and efficient retrieval of double-stranded DNA from aqueous media

W. Q. Brandão<sup>a</sup>, Juan C. Medina-Llamas<sup>a</sup>, José J. Alcaraz-Espinoza<sup>a</sup>, Alicia E. Chávez-Guajardo<sup>a</sup>, Celso P. de Melo<sup>a,\*</sup>

<sup>a</sup>*Departamento de Física, Universidade Federal de Pernambuco, 50670-901 Recife, PE, Brazil*

#### *Polymerization process*

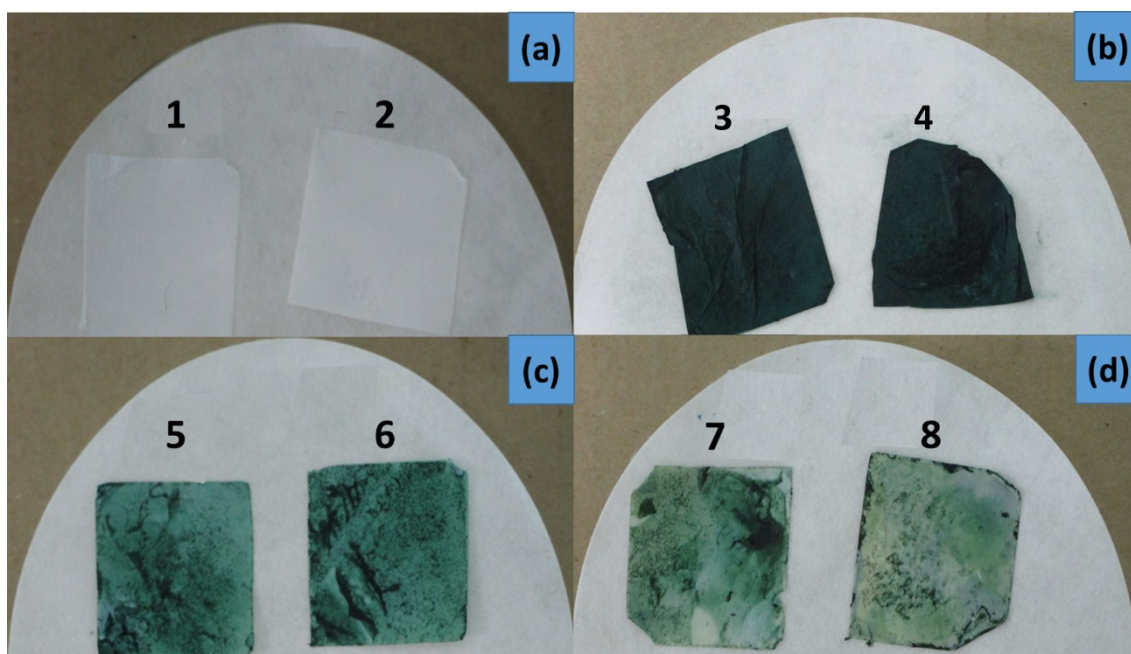

**Figure SI.1.** Visual aspect of the PANI/PS membranes prepared by exposing the PS films to aniline solutions of different monomer concentrations: (a) 0.05, (b) 0.52, (c) 5 and (d) 20 mmol.

### Adsorption isotherms

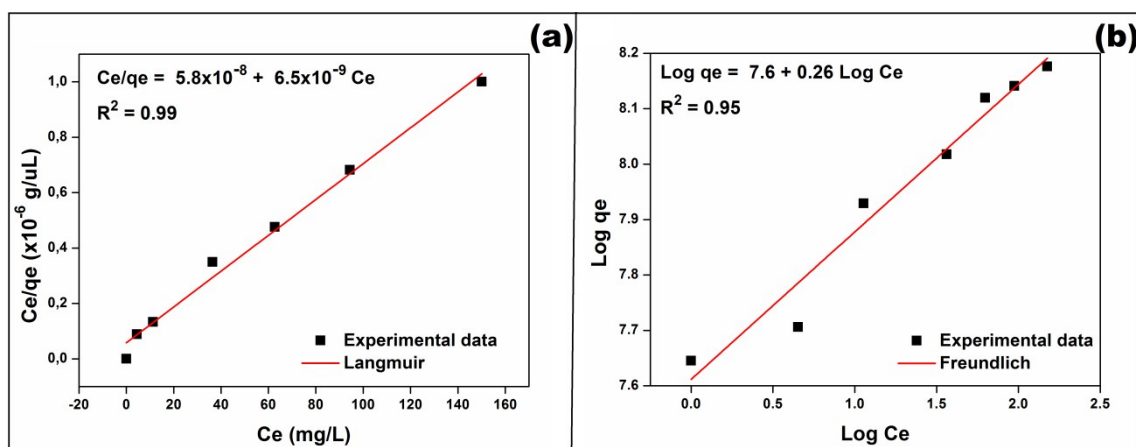

**Figure SI.2.** Linear fitting of the experimental isotherms for DNA adsorption on PANI/PS membranes using (a) Langmuir and (b) Freundlich isotherm models.

### Adsorption kinetics

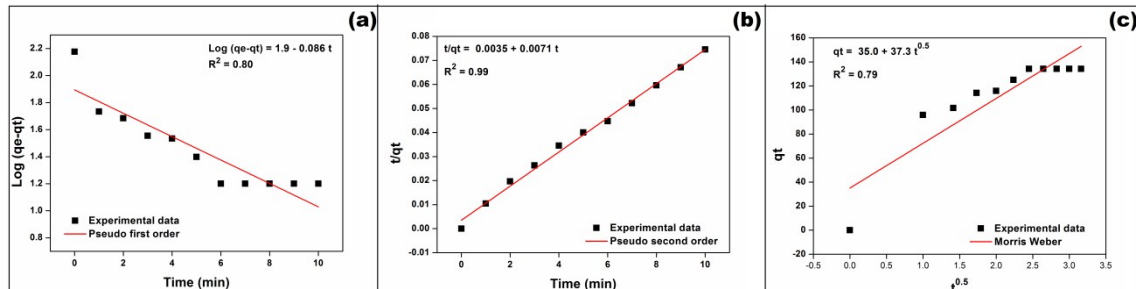

**Figure SI.3.** Linear fitting of the experimental data for kinetics of DNA adsorption on PANI/PS membranes using (a) Pseudo First order, (b) Pseudo Second order and (c) Morris-Weber models.

### Adsorption-Desorption experiments

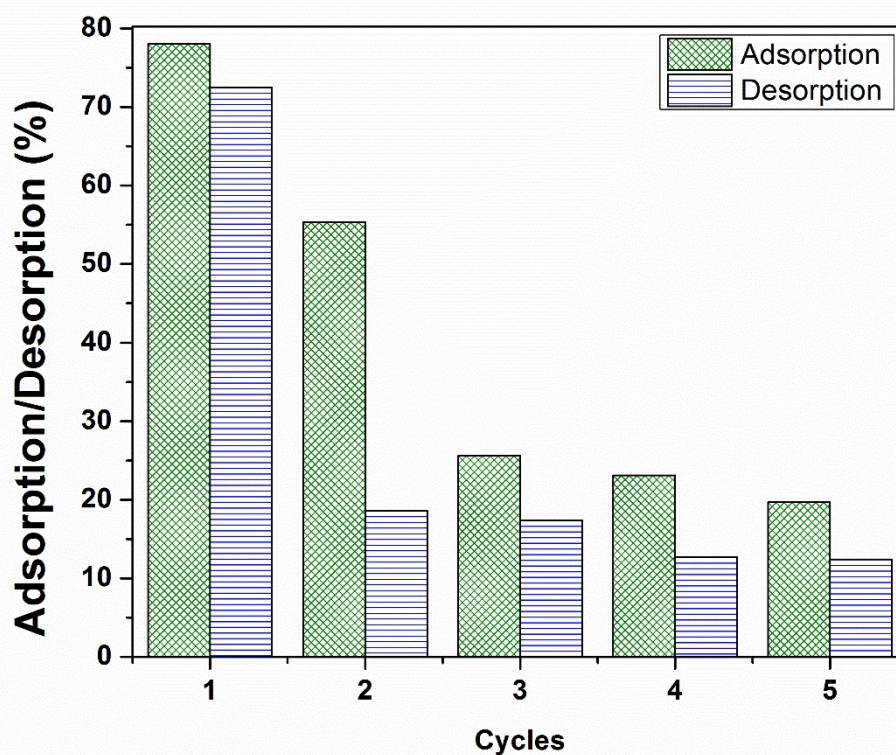

**Figure SI.4.** Degree of DNA adsorption/desorption of a PANI/PS membrane submitted to five consecutive recycling steps.

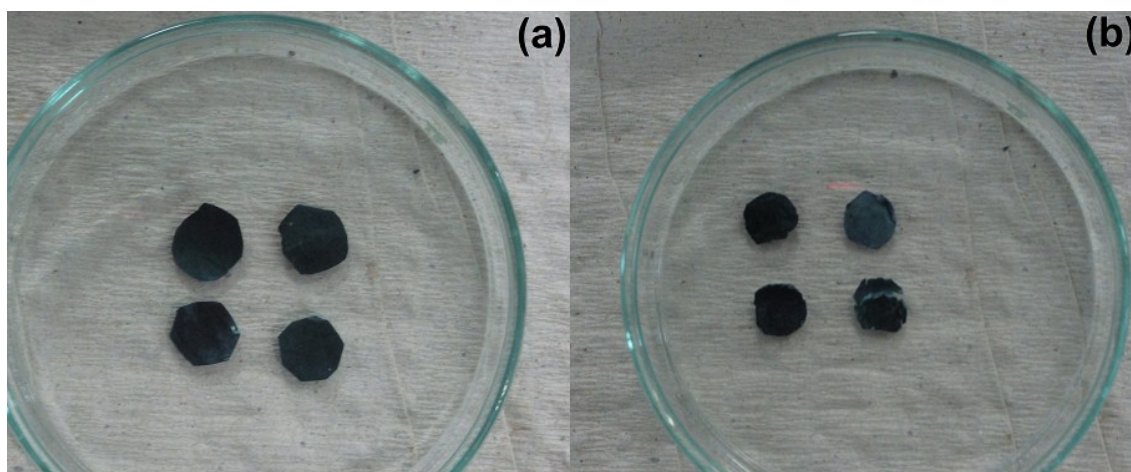

**Figure SI.5.** Visual aspect of PANI/PS membranes: (a) in pristine form and (b) after being submitted to five adsorption/desorption cycles.
